# Supplementary material
Source: Elsevier journal article supplement (https://www.sciencedirect.com/science/article/pii/S0213911121000091)

**Appendix**

**Table I**

List of outpatient and hospitalization services for each site.

| **Lung cancer** | **Colorectal cancer** | **Breast cancer** | **Prostate cancer** |
| --- | --- | --- | --- |
| Respiratory medicine | Gastroenterology | Gynaecology | Urology |
| Otorhinolaryngology | General surgery | General surgery | Internal medicine |
| Thoracic surgery | Internal medicine | Internal medicine | Medical oncology |
| Internal medicine | Medical oncology | Medical oncology | Radiotherapy |
| Medical oncology | Radiotherapy | Radiotherapy |  |
| Radiotherapy |  |  |  |

**Table II**

Unit cost of outpatient and hospitalization services for each site.

| **Department** | **In-hospitalization** | **First consultation** |
| --- | --- | --- |
| Gastroenterology | €4,014 | €339 |
| General surgery | €5,033 | €115 |
| Thoracic surgery | €5,963 | €80 |
| Gynaecology | €5,157 | €142 |
| Internal medicine | €4,742 | €109 |
| Medical oncology | €4,159 | €122 |
| Radiotherapy | €4,526 | €106 |
| Otorhinolaryngology | €4,327 | €93 |
| Respiratory medicine | €4,361 | €146 |
| Urology | €5,463 | €94 |
| Medical day hospital | €99 | |
| Radiotherapy session | €241 | |
| Emergency room | €151 | |

**Table III**

Mean costs of drugs administered in chemotherapy by site and stage.

| **Site** | **Stage** | **Cost chemotherapy** |
| --- | --- | --- |
| Colon | Stage I | €1,497 |
|  | Stage II | €1,933 |
|  | Stage III | €1,914 |
|  | Stage IV | €25,843 |
| Breast | Stage I | €6,662 |
|  | Stage II | €6,562 |
|  | Stage III | €7,181 |
|  | Stage IV | €16,282 |
| Prostate | Stage I | €413 |
|  | Stage II | €533 |
|  | Stage III | €585 |
|  | Stage IV | €3,750 |
| Lung | Stage I | €130 |
|  | Stage II | €217 |
|  | Stage III | €709 |
|  | Stage IV | €5,056 |
| Rectum | Stage I | €1,497 |
|  | Stage II | €1,202 |
|  | Stage III | €1,279 |
|  | Stage IV | €19,399 |

**Figure I.** Distribution of costs by site and stage (stages I to III).


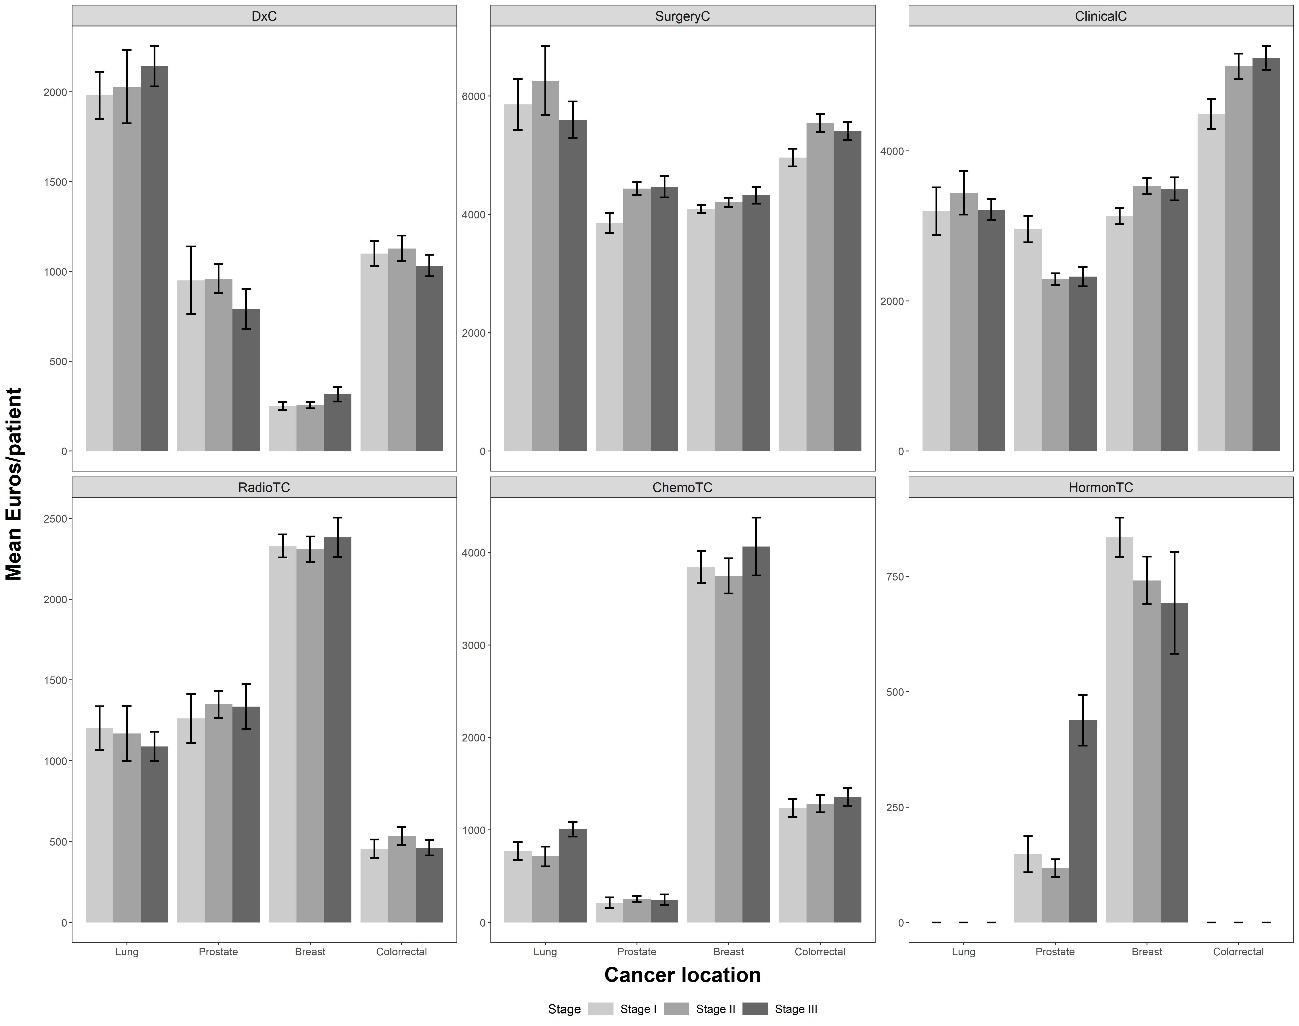


**Figure II.** Plot of the survival functions for patients with stage IV disease in each of the sites considered.


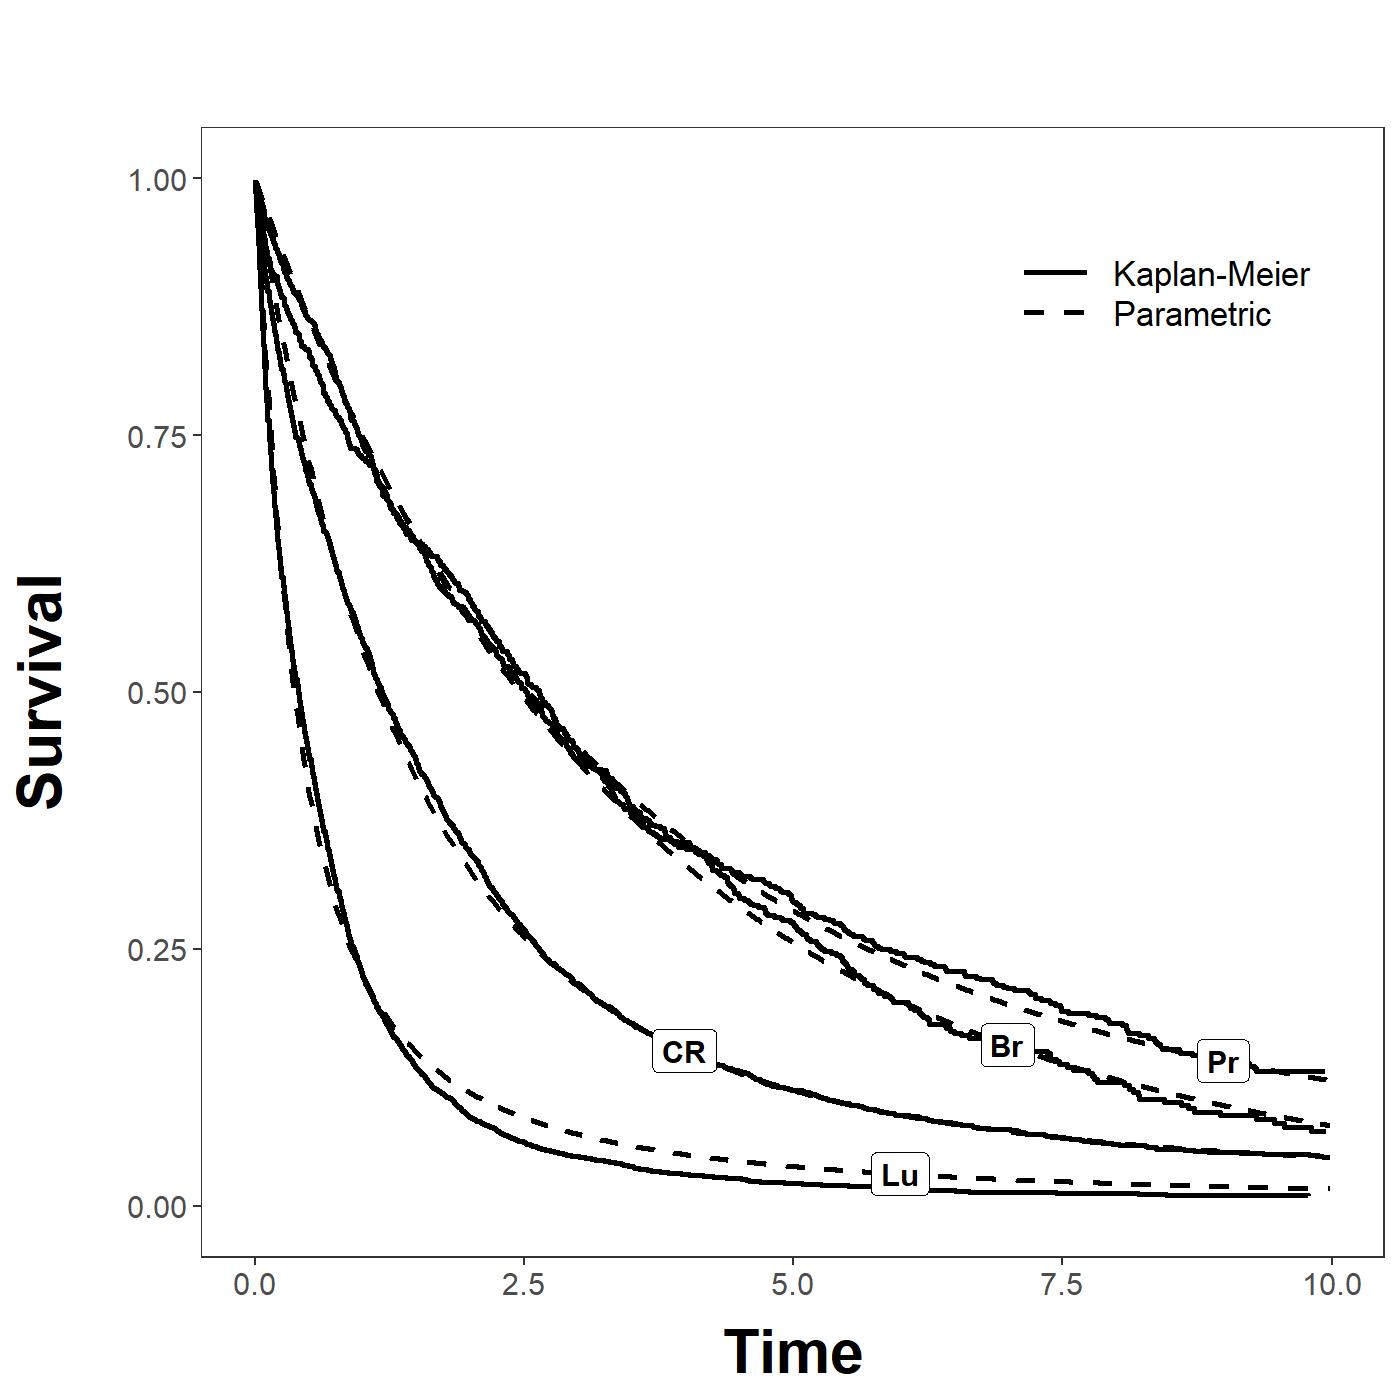

Supplement: mmc1 [file S0213911121000091:mmc1.doc]
